# Supplementary material for: Core body temperature correlates of transition from aerobic to anaerobic metabolism in running
Source: PeerJ. 2025 Jul 17;13:e19686. doi: 10.7717/peerj.19686 (PMC12276734; doi:10.7717/peerj.19686)
Supplement: Supplemental Information 1 [file peerj-13-19686-s001.xls]

## Sheet: Sheet1
Evaluated thresholds (km/h)	Mod or median VT1	Mod or median TT1	Mod or median VT2	Mod or median TT2	1st evaluator VT1	1st evaluator VT2	1st evaluator TT1	1st evaluator TT2	2nd evaluator VT1	2nd evaluator VT2	2nd evaluator TT1	2nd evaluator TT2	3rd evaluator VT1	3rd evaluator VT2	3rd evaluator TT1	3rd evaluator TT2
Participant 1	9	9.5	15	16.5	6.5	15	9.5	16.5	9	15	10	16.5	11	17		16.5
Participant 2	8.5	8	14	16	8	13.5	8	14.25	8.5	14	8	16	10	15	8	16
Participant 3	7	8	11.5	13	7	11.5	7.75	12.75	7	11.5	10	13	8	11.5	8	13.5
Participant 4	8.5	7.25	12.5	10.75	8.25	12.5	7.25	10.75	8.5	12.5	7	11	8.5	13	7.5	13.5
Participant 5	7.75	7.75	14	14	7.75	12.5	7.75	13.5	7.5	14	10	14	9	14	7.5	14
Participant 6	10.5	10	17	16	10.5	14	8	16	10	17	10	16	11	18.5	10.5	17
Participant 7	8.5	7.75	16	16	8.5	14.75	7.75	16	7	16	7.5	16	10.5	17	8	17.5
Participant 8	11	8.5	17.5	14	9	15	8.25	14.5	12	17.5	8.5	14	11	18	8.5	17
Participant 9	11	9	17.5	18	9	14.5	9	18	11	17.5	9	18	11	18	9	18
Participant 10	7.5	7.75	11	13	7.5	11	7.75	11.5	7.5	11	8	13	8	11	7.5	13
Participant 11	6.5	7.5	11	13	8.5	11	7.5		5.5	11	7.5	14	6.5	11	8.5	13
Participant 12	6.5	7.5	11	12.5	6.25	11	7.5	12.5	6.5	11	10	12.5	7	13	6.5	12.5
Participant 13	8	8	11	11.75	8	11	8	11.75	8	11	10	12	7	11		13
Participant 14	8.5	7.5	13	14	8.5	11.5	7.5	13	8.5	14	10	14	9	13	7.5	14
Participant 15	7.5	8	12.5	11.75	7.5	12.5	7	11.75	7.5	12	9.5	14	9	12.5	8	14
Participant 16	7.75	7.5	12	13.5	7.75	11.5	7.5	12.25	6	12.5	11	13.5	8	12	7.5	13.5
Participant 17	8.25	7.75	11.5	13	8.25	11.5	7.75	13	7	11.5	6.5	13	9.5	13	7.75	13.5
Participant 18	9	7.5	13	12	9.25	11.5	7.5	14	6	14		12	9	13	9	15
Participant 19	9	9	13	12.5	9	11.5	8	12.75	10	13	9	12.5	9	13	9	14.5
Participant 20	9.5	7	14	13.5	9.5	14	7	13	9.5	14	7	13.5	9.5	14	7	14
Participant 21	7	8.5	12.5	14	7	12.5	8.5	13.25	7	12.5	8.5	14.5	10	14	9.5	14
Participant 22	7.25	7.5	10.5	10.5	7.25	10.5	7.5	10.25	6	10.5		10.5	7.5	12	7.5	12.5
Participant 23	10.5	8	14	12.75		13	8	12.75	10.5	14.5	8	15.5	10.5	14	8	15.5
Participant 24	8	8	11.5	12	8	11	8.5	12.25	6	11.5		9.5	9	12	8	12
Participant 25	9	9	15	13.5	9	14	9	13	9	15		13.5	10	15	9.5	15
Participant 26	9.25	8	15	13.5	9.25	13	8	13.5	7.5	15	8	14.5	10.5	15	8	16
Participant 27	9.5	11	15	14.5	9.5	15	11	14.75	11	15	11	14	9.5	14.5	11	17
Participant 28	7	9	12.5	14	6.75	12.5	9.25	13	7	12.5	9	14.5	7.5	12.5	8	14
Participant 29	7.5	8	11.5	13	7.25	11.5	8	13	7.5	11.5		13.5	9	13	8	13
Participant 30	6	7	9.5	11	6	9.5	6.75	10.75	5.5	9.5	7.5	11	7	11	7	11.5
Participant 31	8	7.75	12.5	12.5	8	12.5	7.75	13.5	7	12.5	7.5	12.5	8.5	12.5	8	15
Participant 32	8.5	8	11.5	14	8	11.5	8	13	8.5	11.5	7.5	14	8.5	13.5	8	14
Participant 14 (retest)	8.5	9.5	11	11	8.5	10.5	7.75	11	6.25	11	9.5	11	8.5	11.5	9.5	11.5
Participant 16 (retest)	6.5	7.5	12.5	13	6.5	12.5	7.5	13	6	12.5	10	13	8	13	7.5	13
Participant 17 (retest)	8.5	7.25	13	13	8.5	13	7.25	13	9.5	13	7	13	8.5	13	7.5	15
Participant 18 (retest)	8.5	8.5	13.5	13	9	12.5	8.25	13	8.5	13.5	8.5	11	8.5	13.5	8.5	14
Participant 19 (retest)	9	7.5	13.5	14.5	9	13.5	7.5	13.75	10.5	13.5		14.5	9	13.5	7.5	14.5
Participant 20 (retest)	8.5	9	15	14	8.5	13.5	9	14	7.5	15	9	14	10	15	10	15
Participant 21 (retest)	7.75	7.5	12	14	7.75	12	7.75	13.75	7.5	12	7	14.5	8	13.5	7.5	14
Participant 25 (retest)	9.5	9	13	13.5	9.5	13		13.25	9.5	13		14	9.5	13	9	13.5
Participant 28 (retest)	9.75	9	13	14.5	7.5	13	9		9.75	13	8.5	14.5	10	13.5	9	15
Participant 31 (retest)	7	8	10.5	11.5	7	10.5	8	10.75	7	10.5	8	11.5	8.5	12	8	13.5
	VT1-first ventilatory threshold
	VT2-second ventilatory threshold
	TT1-first temperature threshold
	TT2-second temperature threshold
